# Supplementary figures and images for: Determinants of Excessive Screen Time among Children under Five Years Old in Selangor, Malaysia: A Cross-Sectional Study
Source: MDPI journal article supplement (doi:10.3390/ijerph19063560), 2022-03-17

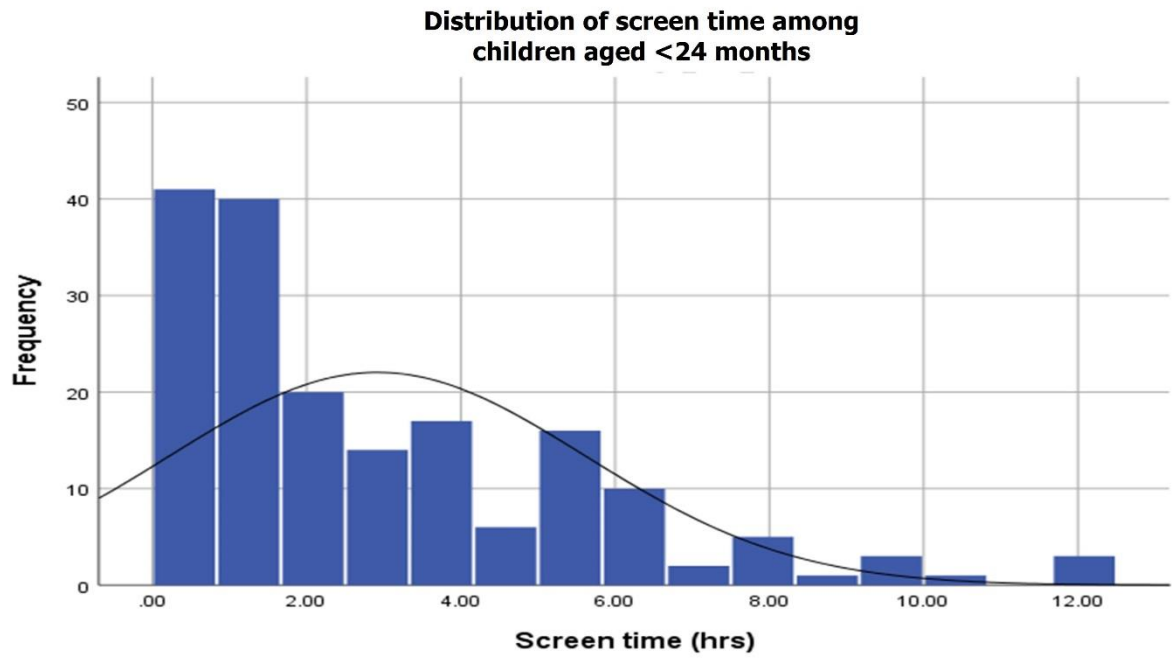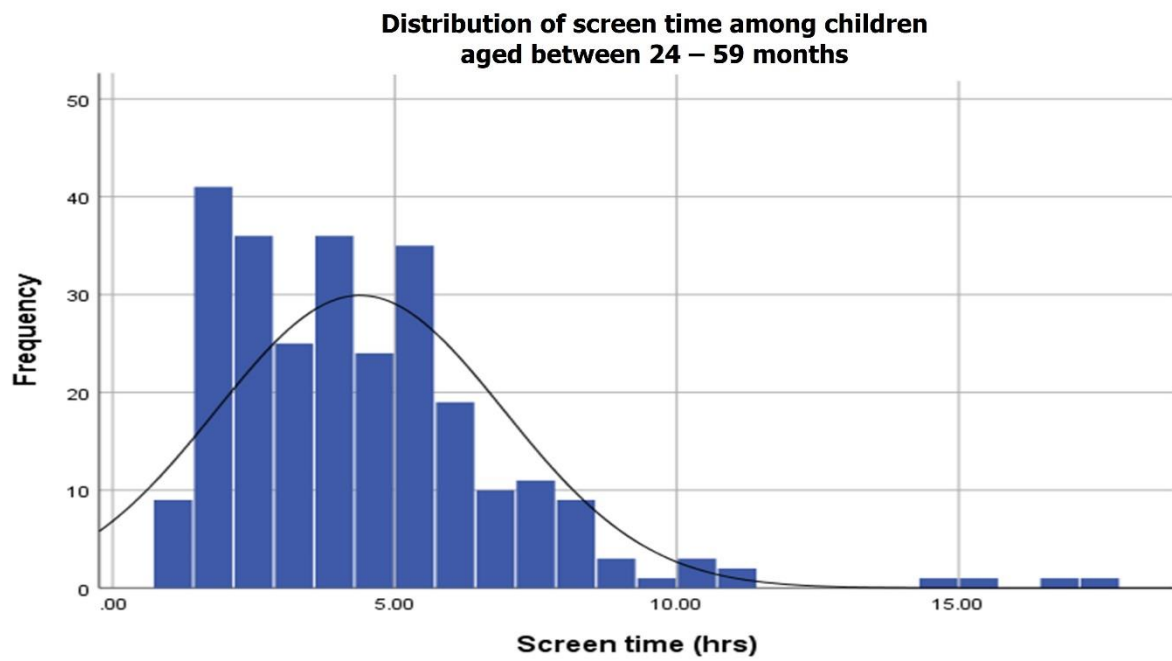

Figure S1. Distribution of screen time among children below 5 years.

Supplement: s1 [file s1]
